# Supplementary material for: Deep Phenotyping Reveals Distinct Immune Signatures Correlating with Prognostication, Treatment Responses, and MRD Status in Multiple Myeloma
Source: PubMed Central journal article supplement (PMC7692501; doi:10.3390/cancers12113245), 2020-11-04
Supplement: cancers-12-03245-s001.pdf [file cancers-12-03245-s001.pdf]

## Supplementary Materials:

# Deep Phenotyping Reveals Distinct Immune Signatures Correlating with Prognostication, Treatment Responses, and MRD Status in Multiple Myeloma

Konstantinos Papadimitriou, Nikolaos Tsakirakis, Panagiotis Malandrakis, Panagiotis Vitsos, Andreas Metousis, Nikolaos Orologas-Stavrou, Ioannis Ntanasis-Stathopoulos, Nikolaos Kanellias, Evangelos Eleutherakis-Papaiakovou, Panagiotis Pothos, Despina Fotiou, Maria Gavriatopoulou, Efsthathios Kastritis, Meletios-Athanasios Dimopoulos, Evangelos Terpos, Ourania E. Tsitsilonis and Ioannis V. Kostopoulos

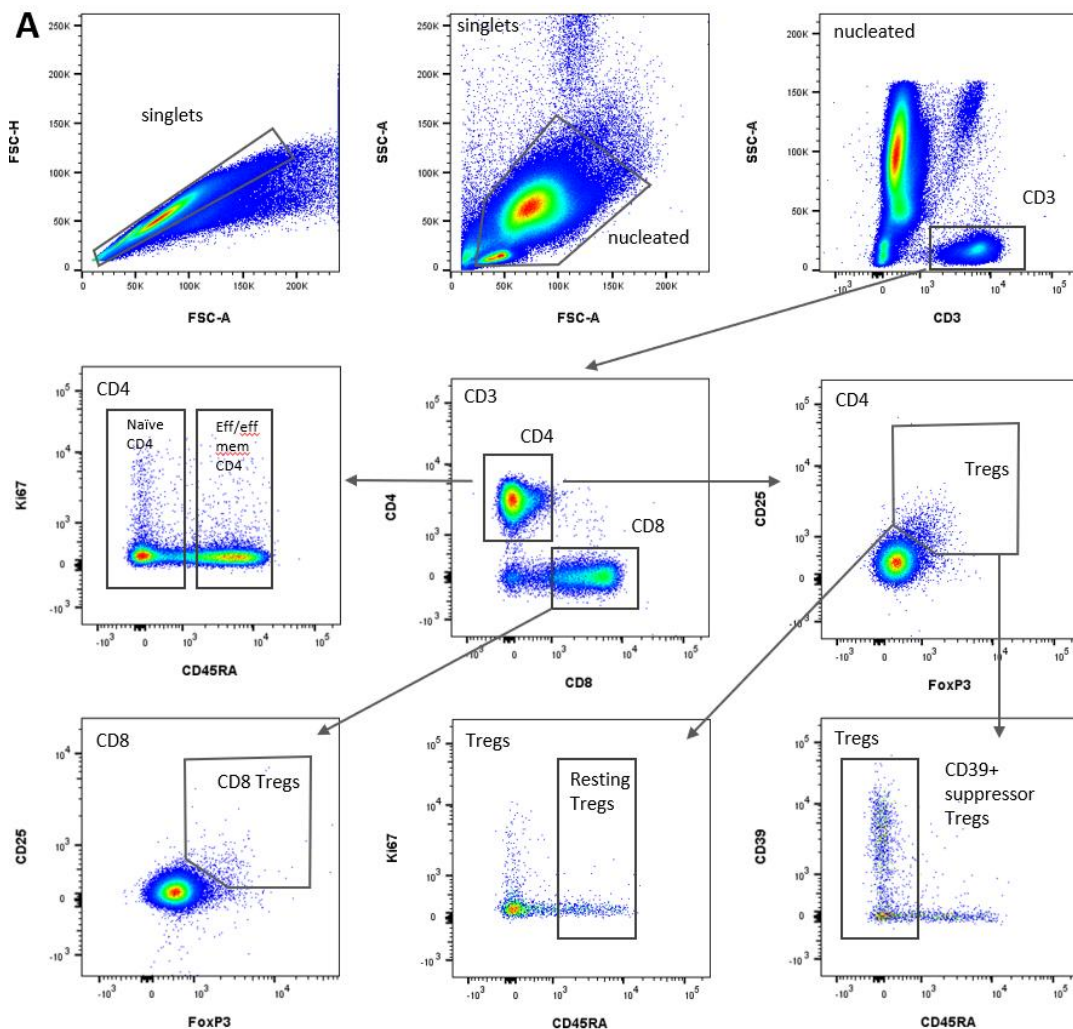

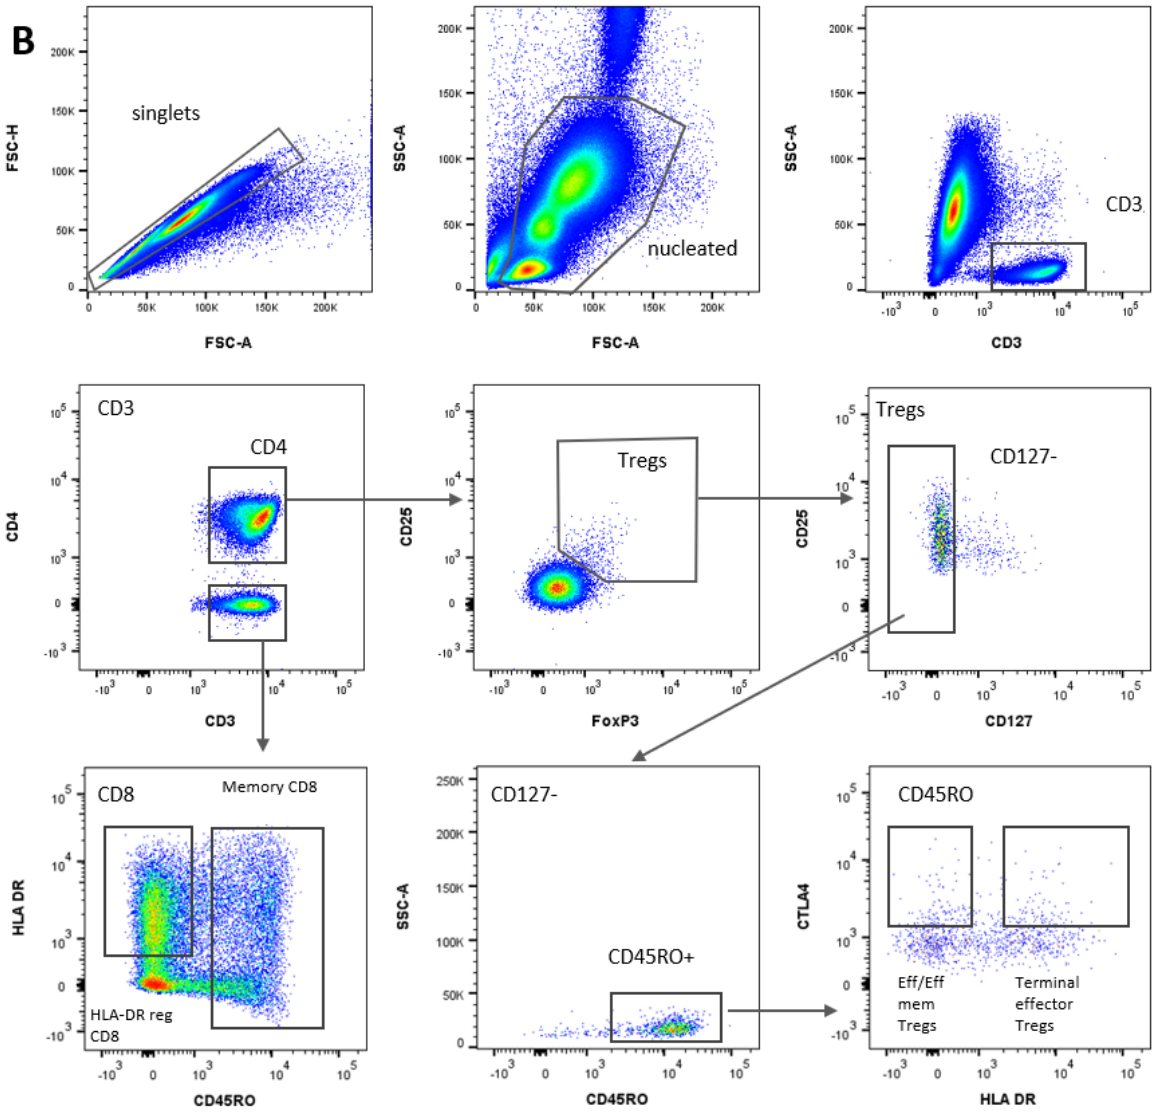

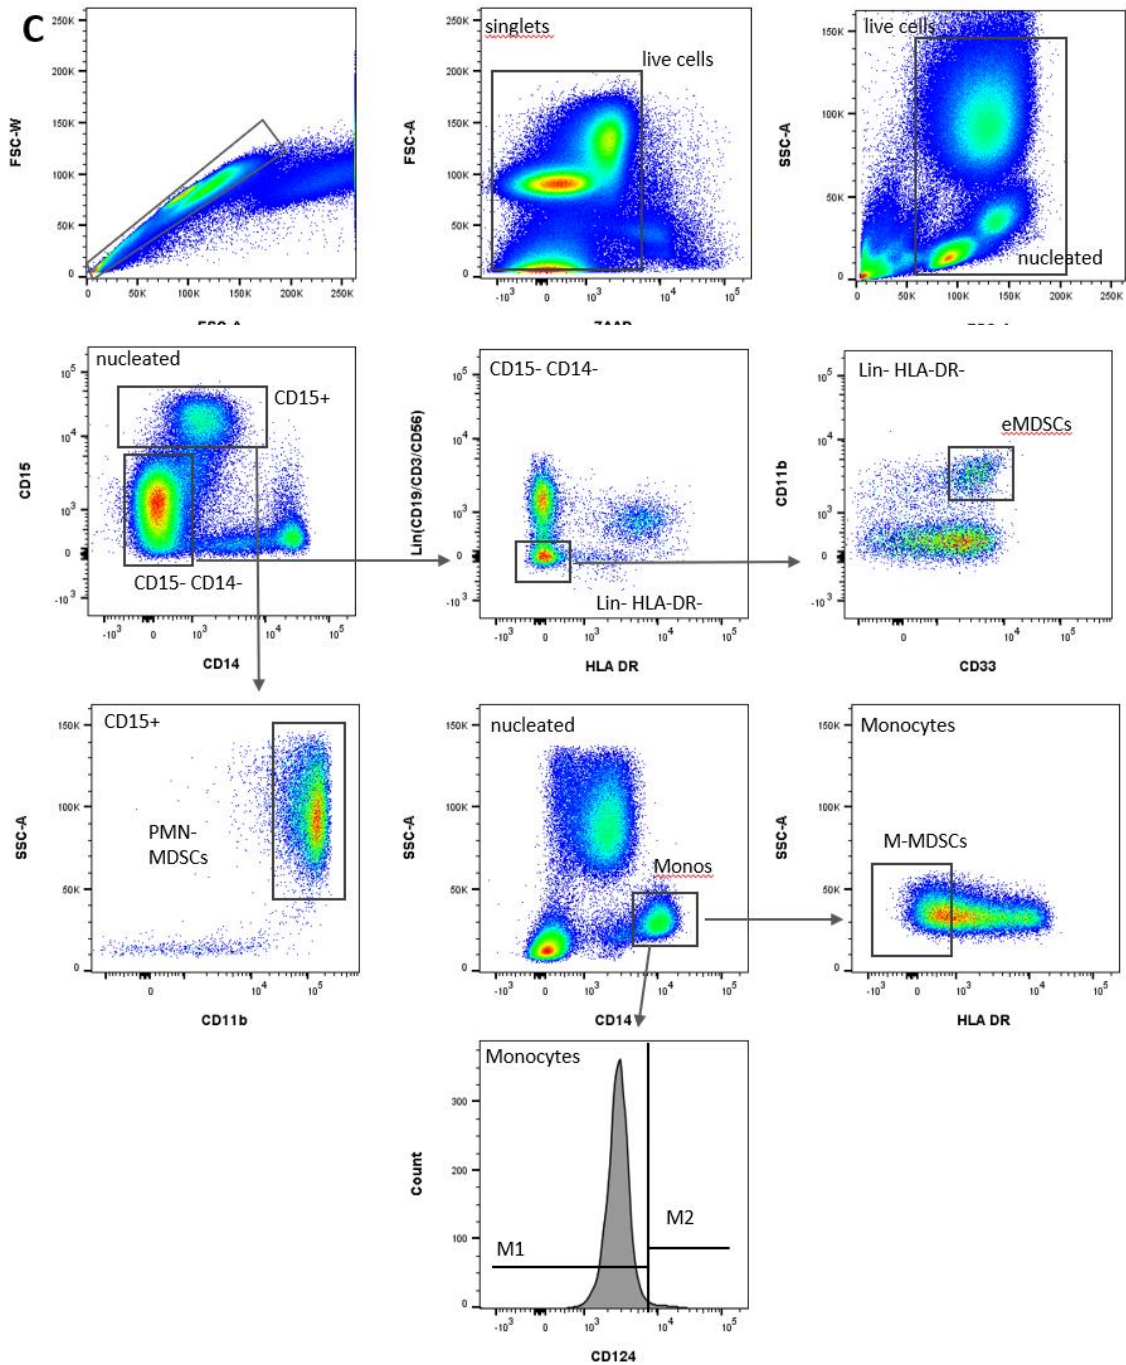

**Figure S1.** (A) Gating strategy of panel 1 for T cells and regulatory T cells analysis (B) Gating strategy of panel 2 for T cells and regulatory T cells analysis. (C) Gating strategy of panel 3 for MDSCs analysis. Live PBMCs were initially selected. Nucleated cells in a CD14–CD15 dot plot were gated for further discrimination of PMN-MDSCs and eMDSCs. The gating strategy followed the recommendations for MDSC characterization [1].

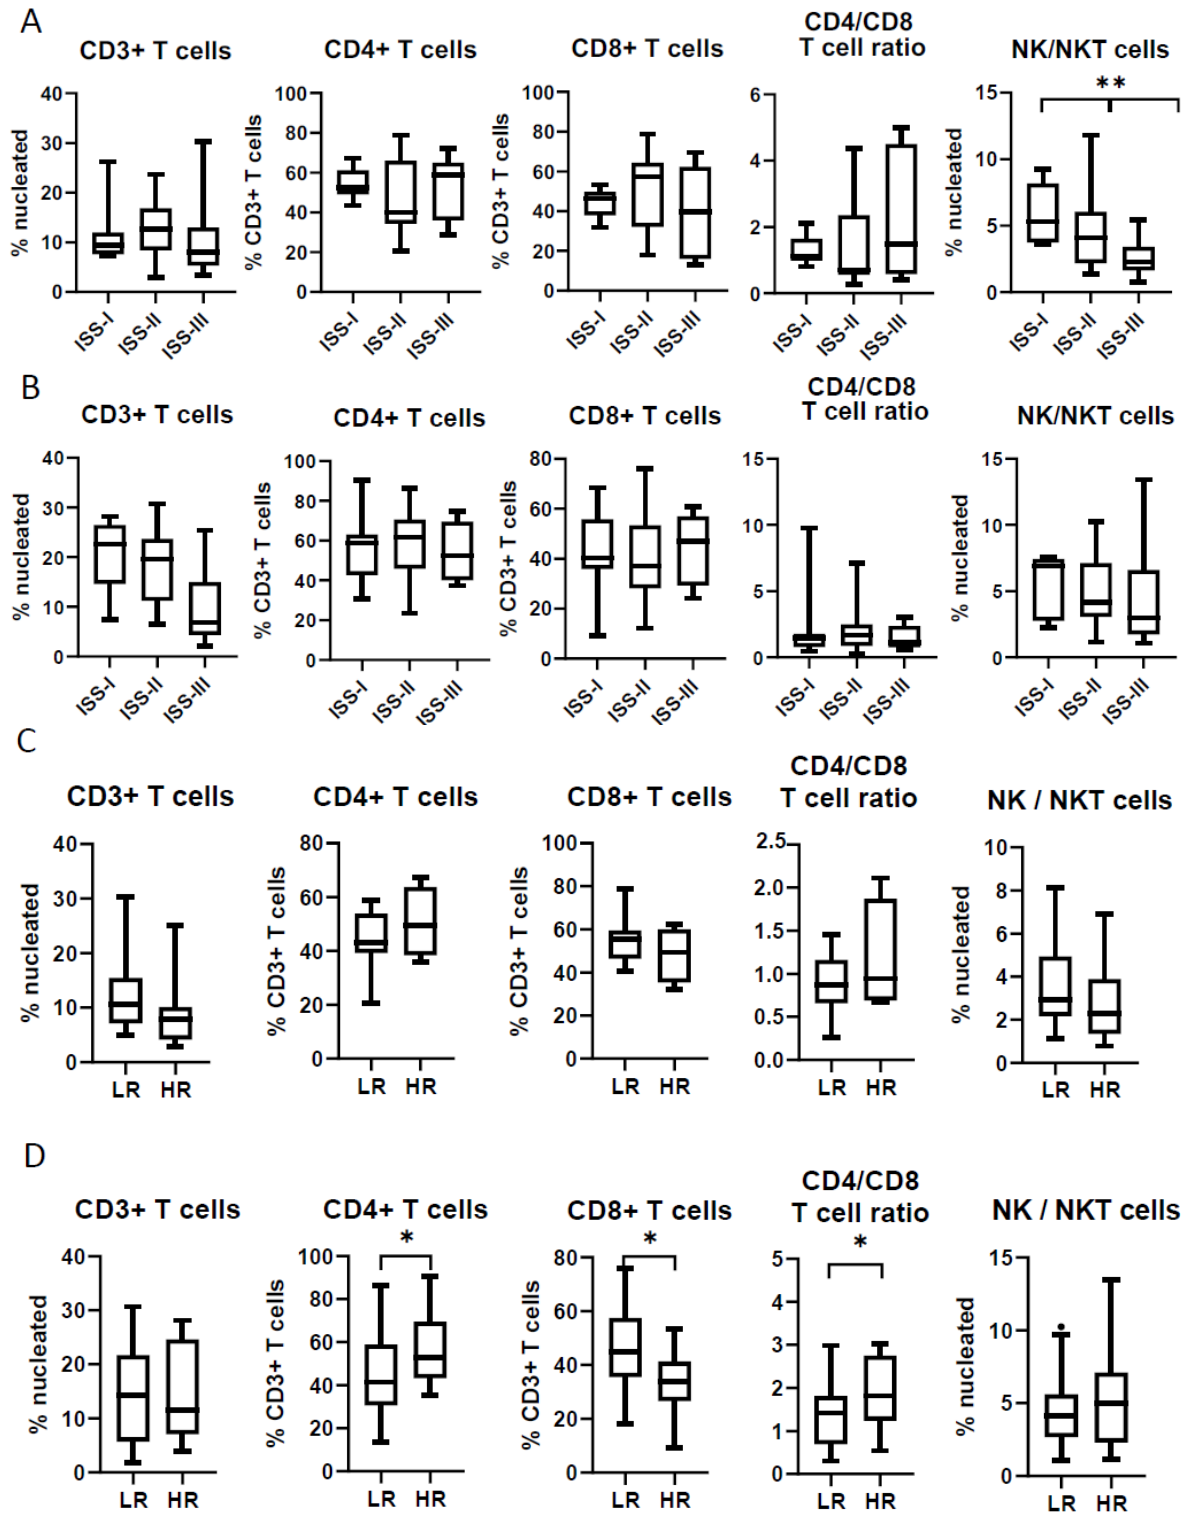

**Figure S2.** Distribution of total T cells, their CD4+ and CD8+ counterpart, the CD4/CD8 ratio and NK/NKT frequency in the bone marrow (BM) and peripheral blood (PB) of MM patients at the time of diagnosis. (A) Distribution in BM according to the International Staging System (ISS); (B) distribution in PB according to ISS stage; (C) distribution in BM according to cytogenetics; (D) distribution in PB according to cytogenetics. \*  $p < 0.05$ ; \*\*  $p < 0.01$ ; HR: high-risk; LR: low-risk.

**Table S1:** Clones and relative providers of antibodies used in the study.

| Antibody  | Clone         | Provider                    |
|-----------|---------------|-----------------------------|
| CD38-FITC | Multi-epitope | Cytogonos, Salamanca, Spain |

|                   |            |                                  |
|-------------------|------------|----------------------------------|
| CD56-PE           | C5.9       | Cytognos, Salamanca, Spain       |
| CD45-PerCPCy5.5   | HI30       | BD Bioscience, San Jose, CA, USA |
| CD138-BV421       | MI15       | BD Bioscience, San Jose, CA, USA |
| CD27-BV510        | O323       | BD Bioscience, San Jose, CA, USA |
| CD19-PC7          | J3-119     | Beckman Coulter, Brea, CA, USA   |
| CD117-APC         | 104D2      | BD Bioscience, San Jose, CA, USA |
| CD81-APCC750      | M38        | Cytognos, Salamanca, Spain       |
| Kappa-APC         | Polyclonal | Agilent, Santa Clara, CA, USA    |
| Lambda-APCC750    | Polyclonal | Cytognos, Salamanca, Spain       |
| CD3-FITC          | HIT3a      | BD Bioscience, San Jose, CA, USA |
| CD4-APC-Cy7       | RPA-T4     | BD Bioscience, San Jose, CA, USA |
| CD8-PerCPCy5.5    | SK1        | BD Bioscience, San Jose, CA, USA |
| CD25-APC          | 555434     | BD Bioscience, San Jose, CA, USA |
| FoxP3-PE          | 236A/E7    | BD Bioscience, San Jose, CA, USA |
| CD127-BV510       | HIL-7R-M21 | BD Bioscience, San Jose, CA, USA |
| CD39-BV421        | TU66       | BD Bioscience, San Jose, CA, USA |
| Ki67-BV510        | B56        | BD Bioscience, San Jose, CA, USA |
| CD45RA-PC7        | HI100      | BD Bioscience, San Jose, CA, USA |
| CD45RO-PerCPCy5.5 | UCHL1      | BD Bioscience, San Jose, CA, USA |
| CTLA4-BV421       | BNI3       | BD Bioscience, San Jose, CA, USA |
| HLA-DR-PC7        | G46-6      | BD Bioscience, San Jose, CA, USA |
| CD14-FITC         | M5E2       | BD Bioscience, San Jose, CA, USA |
| CD11b-PE          | Mac-1      | BD Bioscience, San Jose, CA, USA |
| 7-AAD             |            | BD Bioscience, San Jose, CA, USA |
| CD124-BV421       | hIL4R-M57  | BD Bioscience, San Jose, CA, USA |
| CD33-BV510        | WM53       | BD Bioscience, San Jose, CA, USA |
| HLA-DR-PE         | TU36       | BD Bioscience, San Jose, CA, USA |
| CD15-APC          | HI98       | BD Bioscience, San Jose, CA, USA |
| CD3-APC-Cy7       | SK7        | BD Bioscience, San Jose, CA, USA |
| CD19-APC-Cy7      | 557791     | BD Bioscience, San Jose, CA, USA |
| CD56-APC-Cy7      | HCD56      | Biolegend, San Diego, CA, USA    |

**Table S2.** Relative distribution of various immune subsets in paired bone marrow (BM) and peripheral blood (PB) samples.

| Immune subset                                            | At diagnosis  |               | <i>p</i> value   | In complete remission |               | <i>p</i> value   |
|----------------------------------------------------------|---------------|---------------|------------------|-----------------------|---------------|------------------|
|                                                          | BM            | PB            |                  | BM                    | PB            |                  |
| T cells<br>(% of nucleated cells)                        | 10.52 ± 6.52  | 13.57 ± 8.09  | <b>0.004*</b>    | 8.64 ± 7.30           | 11.25 ± 9.85  | 0.85             |
| CD27+ T cells<br>(% of T cells)                          | 69.80 ± 20.41 | 67.31 ± 20.29 | 0.26             | 50.52 ± 19.12         | 47.58 ± 26.41 | 0.74             |
| CD4+ T cells<br>(% of CD3+ cells)                        | 51.10 ± 14.70 | 61.40 ± 15.7  | <b>&lt;0.001</b> | 40.94 ± 16.06         | 46.33 ± 18.2  | <b>&lt;0.001</b> |
| Naïve CD4+ T cells<br>(% of CD4+ cells)                  | 28.43 ± 21.16 | 34.3 ± 21.5   | <b>0.002</b>     | 15.48 ± 14.02         | 14.50 ± 12.81 | 0.39             |
| Proliferating naïve<br>CD4+ T cells<br>(% of CD4+ cells) | 0.59 ± 0.72   | 0.90 ± 0.71   | <b>0.014</b>     | 0.34 ± 0.45           | 0.21 ± 0.33   | <b>0.006</b>     |

|                                                                                |                  |                  |                  |               |               |                  |
|--------------------------------------------------------------------------------|------------------|------------------|------------------|---------------|---------------|------------------|
| Effector / effector<br>memory CD4+ T cells<br>(% of CD4+ cells)                | 68.44 ±<br>21.47 | 62.13 ±<br>21.70 | <b>&lt;0.001</b> | 82.79 ± 14.84 | 83.89 ± 13.5  | 0.36             |
| Proliferating<br>Effector/effector<br>memory CD4+ T cells<br>(% of CD4+ cells) | 1.55 ± 0.85      | 1.94 ± 0.90      | 0.06             | 2.04 ± 0.91   | 1.9 ± 0.88    | 0.34             |
| Tregs<br>(% of CD4+ cells)                                                     | 1.19 ± 0.86      | 1.10 ± 0.80      | 0.57             | 1.74 ± 1.48   | 1.71 ± 1.52   | 0.88             |
| Resting Tregs<br>(% of Tregs)                                                  | 15.33 ±<br>16.44 | 16.30 ±<br>19.75 | 0.92             | 8.11 ± 19.24  | 9.03 ± 19.21  | 0.51             |
| Proliferating resting<br>Tregs<br>(% of Tregs)                                 | 3.11 ± 4.69      | 6.25 ±<br>10.54  | 0.26             | 1.16 ± 1.98   | 0.79 ± 1.79   | 0.54             |
| Effector/effector<br>memory Tregs<br>(% of Tregs)                              | 14.60 ± 8.23     | 9.33 ± 8.03      | <b>0.03</b>      | 12.18 ± 7.83  | 12.06 ± 11.42 | 0.51             |
| Proliferating<br>effector/effector<br>memory Tregs<br>(% of Tregs)             | 0.15 ± 0.09      | 1.16 ± 0.62      | 0.43             | 1.48 ± 0.43   | 1.41 ± 1.32   | 0.74             |
| Terminal effector<br>Tregs<br>(% of Tregs)                                     | 16.01 ± 10.9     | 7.43 ± 6.5       | <b>0.01</b>      | 14.62 ± 12.15 | 14.06 ± 10.4  | 0.59             |
| CD39+ suppressor<br>Tregs<br>(% of Tregs)                                      | 36.13 ±<br>31.89 | 47.2 ± 22.2      | 0.14             | 48.12 ± 30    | 50.94 ± 29.46 | 0.32             |
| Proliferating CD39+<br>suppressor Tregs<br>(% of Tregs)                        | 4.54 ± 6.28      | 8.1 ± 6.3        | <b>0.003</b>     | 6.19 ± 4.66   | 6.89 ± 4.66   | 0.41             |
| CD8+ T cells<br>(% of CD3+ cells)                                              | 46.50 ±<br>15.06 | 36.8 ± 15.9      | <b>&lt;0.001</b> | 53.14 ± 15.91 | 43.82 ± 18.04 | <b>&lt;0.001</b> |
| Proliferating CD8+ T<br>cells<br>(% of CD8 cells)                              | 2.17 ± 1.23      | 2.52 ± 1.73      | 0.27             | 1.74 ± 1.19   | 1.61 ± 1.13   | 0.39             |
| HLA-DR regulatory<br>CD8+ T cells<br>(% of CD8 cells)                          | 11.93 ± 7.65     | 7.30 ± 5.74      | <b>&lt;0.001</b> | 16.72 ± 14.34 | 17.66 ± 17.65 | 0.93             |
| Memory CD8+ T cells<br>(% of CD8 cells)                                        | 27.48 ±<br>15.41 | 27.1 ± 13.8      | 0.87             | 34.56 ± 19.97 | 31.79 ± 20.90 | 0.22             |
| CD8+ Tregs<br>(% CD8+ cells)                                                   | 0.25 ± 0.82      | 0.29 ± 1.02      | 0.28             | 0.34 ± 1.39   | 0.27 ± 1.17   | 0.27             |
| B cells<br>(% of nucleated cells)                                              | 1.49 ± 1.15      | 1.42 ± 0.93      | 0.69             | 3.51 ± 4.34   | 4.2 ± 5.24    | 0.54             |
| Memory B cells<br>(% of B cells)                                               | 34.21 ± 21.7     | 36.90 ±<br>20.73 | <b>0.03</b>      | 9.21 ± 15.28  | 10.34 ± 12.47 | 0.67             |
| Naïve B cells<br>(% of B cells)                                                | 46.74 ±<br>21.79 | 61.61 ±<br>20.56 | <b>&lt;0.001</b> | 48.73 ± 25.18 | 63.47 ± 25.14 | 0.74             |
| B cell precursors<br>(% of B cells)                                            | 19.09 ±<br>16.54 | 2.02 ± 2.11      | <b>&lt;0.001</b> | 37.17 ± 27.07 | 1.07 ± 1.25   | <b>&lt;0.001</b> |
| PMN-MDSCs<br>(% of mononuclear<br>cells)                                       | 2.38 ± 3.53      | 9.86 ±<br>11.82  | <b>0.03</b>      | 3.85 ± 5.02   | 14.18 ± 13.31 | 0.07             |
| M-MDSCs<br>(% of mononuclear<br>cells)                                         | 6.12 ± 4.02      | 10.11 ±<br>5.38  | <b>0.04</b>      | 11.92 ± 10.81 | 7.64 ± 10.21  | 0.58             |
| eMDSCs                                                                         | 0.32 ± 0.49      | 0.55 ± 1.01      | 0.32             | 0.51 ± 0.65   | 0.85 ± 0.80   | 0.36             |

|                          |               |               |                  |               |               |      |
|--------------------------|---------------|---------------|------------------|---------------|---------------|------|
| (% of mononuclear cells) |               |               |                  |               |               |      |
| Monocytes PB / TAMS BM   | 3.16 ± 1.67   | 6.63 ± 2.63   | <b>&lt;0.001</b> | 5.24 ± 2.91   | 6.87 ± 4.41   | 0.12 |
| (% of nucleated cells)   |               |               |                  |               |               |      |
| M1 monocytes             | 97.8 ± 0.94   | 98.26 ± 0.64  | 0.10             | 98.11 ± 1.24  | 97.27 ± 1.49  | 0.84 |
| (% of monocytes)         |               |               |                  |               |               |      |
| M2 monocytes             | 2.20 ± 0.94   | 1.72 ± 0.64   | 0.09             | 1.89 ± 1.24   | 2.73 ± 1.49   | 0.06 |
| (% of monocytes)         |               |               |                  |               |               |      |
| NK/NKT cells             | 3.23 ± 1.84   | 4.43 ± 2.73   | <b>0.005</b>     | 3.02 ± 2.76   | 3.94 ± 3.14   | 0.08 |
| (% nucleated cells)      |               |               |                  |               |               |      |
| CD27+ NK/NKT cells       | 17.01 ± 10.23 | 14.20 ± 9.91  | <b>0.016</b>     | 13.64 ± 7.15  | 15.24 ± 8.32  | 0.12 |
| (% of NK/NKT cells)      |               |               |                  |               |               |      |
| Neutrophils              | 68.11 ± 11.99 | 65.19 ± 13.04 | 0.55             | 60.88 ± 23.66 | 63.88 ± 19.23 | 0.24 |
| (% nucleated cells)      |               |               |                  |               |               |      |

\* *p* values in bold characters denote statistically significant differences.

## Reference

1. Bronte, V.; Brandau, S.; Chen, S.-H.; Colombo, M.P.; Frey, A.B.; Greten, T.F.; Mandruzzato, S.; Murray, P.J.; Ochoa, A.; Ostrand-Rosenberg, S.; et al. Recommendations for myeloid-derived suppressor cell nomenclature and characterization standards. *Nat. Commun.* **2016**, *7*, 12150, doi:10.1038/ncomms12150.
